# Supplementary material for: Positional isomeric tunable two Co(ii) 6-connected 3-D frameworks with pentanuclear to binuclear units: structures, ion-exchange and magnetic properties
Source: Royal Society of Chemistry journal article supplement (doi:10.1039/c4dt01086h), 2014-07-11
Supplement: c4dt01086h1.pdf [file c4dt01086h1.pdf]

*Electronic Supplementary Information for*

**Positional Isomeric Tunable Two Co(II) 6-Connected 3-D Frameworks with  
Pentanuclear to Binuclear Units: Structures, Ion-Exchange and Magnetic  
Properties**

Min-Le Han,<sup>a,b</sup> Ya-Ping Duan,<sup>a</sup> Dong-Sheng Li,<sup>\*,a,b</sup> Hai-Bin Wang,<sup>a</sup> Jun Zhao,<sup>a</sup> and Yao-Yu  
Wang<sup>b</sup>

<sup>a</sup>*College of Materials and Chemical Engineering, Collaborative Innovation Center for Microgrid  
of New Energy of Hubei Province, China Three Gorges University, Yichang 443002, P. R. China*

<sup>b</sup>*Key Laboratory of Synthetic and Natural Functional Molecule Chemistry of the Ministry of  
Education, College of Chemistry & Materials Science, Northwest University, Xi'an 710069, P. R.  
China*

\* Corresponding author: College of Materials and Chemical Engineering, China Three Gorges  
University, Yichang, P. R. China. Tel./Fax: +86-717- 6397506;

E-mail address: lidongsheng1@126.com (D.-S. Li)

**Table S1** Selected bond lengths (Å) and bond angles (°) for complexes **1** and **2**.

| <b>1</b>            |            |                     |            |
|---------------------|------------|---------------------|------------|
| Co(1)-O(5)#1        | 2.078(2)   | Co(1)-O(5)          | 2.078(2)   |
| Co(1)-O(2)          | 2.077(2)   | Co(1)-O(2)#1        | 2.077(2)   |
| Co(1)-O(7)#1        | 2.101(2)   | Co(1)-O(7)          | 2.101(2)   |
| Co(2)-O(5)          | 2.067(2)   | Co(2)-O(4)#2        | 2.071(2)   |
| Co(2)-N(4)#3        | 2.112(3)   | Co(2)-N(8)#1        | 2.122(3)   |
| Co(2)-O(6)#1        | 2.154(2)   | Co(2)-O(2)#1        | 2.248(2)   |
| Co(3)-O(3)#2        | 2.024(3)   | Co(3)-O(5)          | 2.043(2)   |
| Co(3)-N(5)          | 2.103(3)   | Co(3)-N(1)          | 2.142(3)   |
| Co(3)-O(1)          | 2.150(2)   | Co(3)-O(7)          | 2.354(2)   |
| O(2)-Co(1)-O(2)#1   | 180.000(1) | O(2)-Co(1)-O(5)     | 95.87(8)   |
| O(2)#1-Co(1)-O(5)   | 84.13(8)   | O(2)-Co(1)-O(5)#1   | 84.13(8)   |
| O(2)#1-Co(1)-O(5)#1 | 95.87(8)   | O(5)-Co(1)-O(5)#1   | 180.000(1) |
| O(2)-Co(1)-O(7)     | 89.87(9)   | O(2)#1-Co(1)-O(7)   | 90.13(9)   |
| O(5)-Co(1)-O(7)     | 85.30(9)   | O(5)#1-Co(1)-O(7)   | 94.70(9)   |
| O(2)-Co(1)-O(7)#1   | 90.13(9)   | O(2)#1-Co(1)-O(7)#1 | 89.87(9)   |
| O(5)-Co(1)-O(7)#1   | 94.70(9)   | O(5)#1-Co(1)-O(7)#1 | 85.30(9)   |
| O(7)-Co(1)-O(7)#1   | 180.000(1) | O(5)-Co(2)-O(4)#2   | 94.10(9)   |
| O(5)-Co(2)-N(4)#3   | 93.08(10)  | O(4)#2-Co(2)-N(4)#3 | 92.52(11)  |
| O(5)-Co(2)-N(8)#1   | 172.51(10) | O(4)#2-Co(2)-N(8)#1 | 90.20(11)  |
| N(4)#3-Co(2)-N(8)#1 | 92.86(11)  | O(5)-Co(2)-O(6)#1   | 87.05(9)   |
| O(4)#2-Co(2)-O(6)#1 | 176.45(10) | N(4)#3-Co(2)-O(6)#1 | 90.76(11)  |
| N(8)#1-Co(2)-O(6)#1 | 88.31(11)  | O(5)-Co(2)-O(2)#1   | 80.22(8)   |
| O(4)#2-Co(2)-O(2)#1 | 87.58(10)  | N(4)#3-Co(2)-O(2)#1 | 173.29(9)  |
| N(8)#1-Co(2)-O(2)#1 | 93.85(10)  | O(6)#1-Co(2)-O(2)#1 | 89.31(9)   |
| O(3)#2-Co(3)-O(5)   | 96.08(9)   | O(3)#2-Co(3)-N(5)   | 90.27(12)  |

---

|                   |            |                   |            |
|-------------------|------------|-------------------|------------|
| O(5)-Co(3)-N(5)   | 169.64(10) | O(3)#2-Co(3)-N(1) | 97.42(12)  |
| O(5)-Co(3)-N(1)   | 96.76(10)  | N(5)-Co(3)-N(1)   | 90.49(12)  |
| O(3)#2-Co(3)-O(1) | 174.41(11) | O(5)-Co(3)-O(1)   | 86.16(9)   |
| N(5)-Co(3)-O(1)   | 86.81(11)  | N(1)-Co(3)-O(1)   | 87.37(10)  |
| O(3)#2-Co(3)-O(7) | 88.40(10)  | O(5)-Co(3)-O(7)   | 79.84(9)   |
| N(5)-Co(3)-O(7)   | 92.20(10)  | N(1)-Co(3)-O(7)   | 173.57(10) |
| O(1)-Co(3)-O(7)   | 86.96(9)   |                   |            |

2

|                     |            |                     |            |
|---------------------|------------|---------------------|------------|
| Co(1)-O(7)          | 2.057(2)   | Co(2)-N(4)#3        | 2.131(3)   |
| Co(1)-O(3)#1        | 2.102(2)   | Co(2)-O(1)          | 2.068(2)   |
| Co(1)-O(2)          | 2.101(2)   | Co(2)-O(6)          | 2.066(2)   |
| Co(1)-N(1)          | 2.119(3)   | Co(2)-O(8)#2        | 2.095(3)   |
| Co(1)-N(5)          | 2.154(3)   | Co(2)-N(8)#3        | 2.128(3)   |
| Co(1)-O(5)          | 2.165(2)   | Co(2)-O(5)          | 2.188(2)   |
| O(7)-Co(1)-O(3)#1   | 177.90(10) | O(7)-Co(1)-O(2)     | 95.01(10)  |
| O(2)-Co(1)-O(3)#1   | 84.77(11)  | O(7)-Co(1)-N(1)     | 90.46(10)  |
| O(2)-Co(1)-N(1)     | 87.31(10)  | O(3)#1-Co(1)-N(1)   | 91.62(11)  |
| O(7)-Co(1)-N(5)     | 89.17(10)  | O(2)-Co(1)-N(5)     | 173.91(11) |
| O(3)#1-Co(1)-N(5)   | 91.22(11)  | N(1)-Co(1)-N(5)     | 88.23(11)  |
| O(7)-Co(1)-O(5)     | 88.91(9)   | O(2)-Co(1)-O(5)     | 95.71(9)   |
| O(3)#1-Co(1)-O(5)   | 89.04(9)   | N(1)-Co(1)-O(5)     | 176.96(10) |
| N(5)-Co(1)-O(5)     | 88.78(9)   | O(6)-Co(2)-O(1)     | 95.40(10)  |
| O(6)-Co(2)-O(8)#2   | 89.36(10)  | O(1)-Co(2)-O(8)#2   | 173.97(9)  |
| O(6)-Co(2)-N(8)#3   | 176.74(11) | O(1)-Co(2)-N(8)#3   | 87.78(11)  |
| O(8)#2-Co(2)-N(8)#3 | 87.41(11)  | O(6)-Co(2)-N(4)#3   | 91.23(11)  |
| O(1)-Co(2)-N(4)#3   | 88.31(10)  | O(8)#2-Co(2)-N(4)#3 | 87.90(10)  |

---

|                     |           |                   |            |
|---------------------|-----------|-------------------|------------|
| N(8)#3-Co(2)-N(4)#3 | 88.14(11) | O(6)-Co(2)-O(5)   | 89.15(9)   |
| O(1)-Co(2)-O(5)     | 94.51(9)  | O(8)#2-Co(2)-O(5) | 89.24(9)   |
| N(8)#3-Co(2)-O(5)   | 91.33(10) | N(4)#3-Co(2)-O(5) | 177.11(11) |

Symmetry codes: #1:  $-x + 1, -y + 1, -z + 1$ ; #2:  $x, y + 1, z$ ; #3:  $-x + 1, -y + 1, -z$  for **1**; #1:  $x + 1, y, z$ ; #2:  $x, -y + 1, z + 1/2$ ; #3:  $x - 1, -y + 2, z + 1/2$  for **2**.

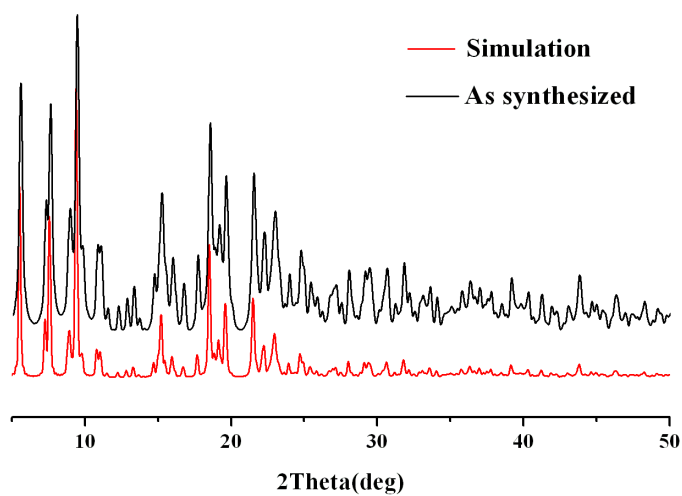

**1**

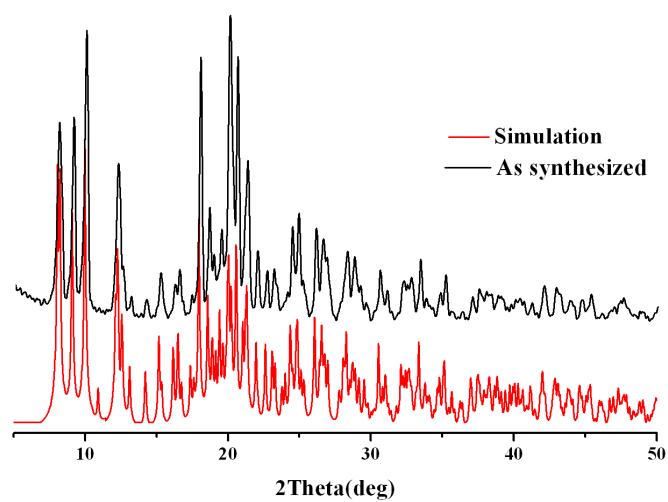

**2**

**Figure S1** Comparison of the experimental and simulated PXR D patterns.



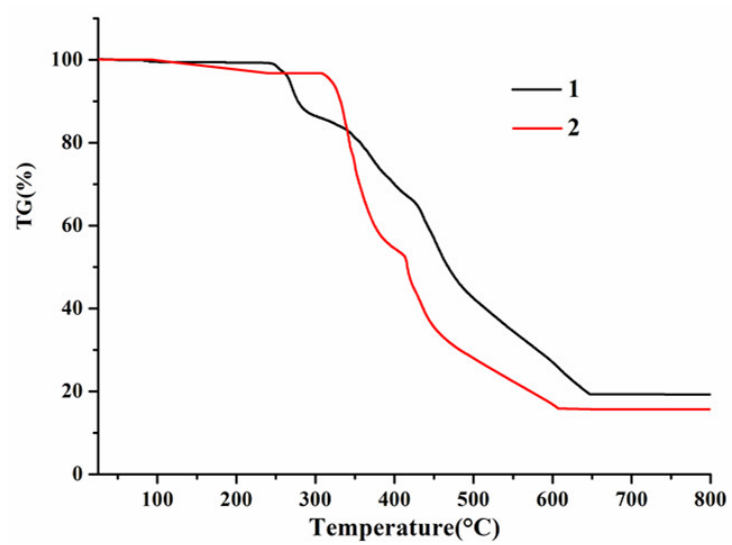

**Figure S2** TGA plots of **1** and **2**.
